# Supplementary material for: Risk of reoperation within 12 months following osteosynthesis of a displaced femoral neck fracture is linked mainly to initial fracture displacement while risk of death may be linked to bone quality: a cohort study from Danish Fracture Database
Source: PubMed Central journal article supplement (PMC7006706; doi:10.1080/17453674.2019.1698503), 2019-12-05
Supplement: IORT_A_1698503_SM0780.pdf [file IORT_A_1698503_SM0780.pdf]

## Supplementary data

Table 1. Intra- and interreader measurements

|                              |                | CCC (CI) <sup>a</sup> | md <sup>b</sup> | SD (md) | CI (md)            | LOA <sup>c</sup>  | COV (%) <sup>d</sup> |
|------------------------------|----------------|-----------------------|-----------------|---------|--------------------|-------------------|----------------------|
| Intraobserver Reader 1 (AMN) | Cortical index | 0.92 (0.87–0.96)      | 0.00052         | 0.030   | (–0.059 to 0.060)  | (–0.060 to 0.059) | 5.74                 |
| Intraobserver Reader 2 (HP)  | Cortical index | 0.93 (0.87–0.96)      | 0.0038          | 0.027   | (–0.0037 to 0.011) | (–0.057 to 0.049) | 5.32                 |
| Interobserver Reader 1 vs 2  | Cortical index | 0.90 (0.85–0.93)      | 0.013           | 0.030   | (0.0066 to 0.019)  | (–0.046 to 0.072) | 5.82                 |

<sup>a</sup> CCC = Lin's concordance correlation coefficient

<sup>b</sup> md = mean difference

<sup>c</sup> LOA = Limits of agreement

<sup>d</sup> COV = Coefficient of variation

References

<sup>a</sup> Lin L I. A concordance correlation coefficient to evaluate reproducibility. *Biometrics* 1989; 45(1): 255-68.

<sup>c</sup> Bland J M, Altman D G. Statistical methods for assessing agreement between two methods of clinical measurement. *Lancet* 1986; 327: 307-10. doi:10.1016/S0140-6736(86)90837-8

<sup>d</sup> Jones R. *Clinical Investigation and statistics in laboratory medicine*. London: ACB Venture Publications; 1997.

<sup>d</sup> Synek V. Evaluation of the standard deviation from duplicate results. *Accredit Qual Assur* 2008; 13(6): 335-7. doi:10.1007/s00769-008-0390-x
